# Supplementary material for: Education and information needs for physicians about rare diseases in Spain
Source: PubMed Central journal article supplement (PMC6969468; doi:10.1186/s13023-019-1285-0), 2020-01-17
Supplement: 13023_2019_1285_MOESM1_ESM.pdf [file 13023_2019_1285_MOESM1_ESM.pdf]

## Anexo 1. Encuesta

1. Sexo:  0. Mujer  
 1. Varón

2. Edad:

3. Años de ejercicio profesional:

4. Ámbito laboral:  0. Hospital (*Pasar a pregunta 6*)  
 1. Atención Primaria

5. Centro de salud en Logroño:  0. No  
 1. Sí

### **A continuación, marque con una x la respuesta que considere**

6. ¿Se incluyeron las enfermedades raras en su plan de estudios de la Licenciatura o Grado en Medicina?

- 0. No
- 1. Sí
- 2. No lo recuerdo

7. ¿Durante el periodo de formación MIR se formó sobre enfermedades raras?

- 0. No
- 1. Sí
- 2. No lo recuerdo
- 3. No hice el MIR

8. ¿Ha asistido a conferencias, cursos, congresos, jornadas, talleres educativos, etc. sobre enfermedades raras en los últimos 5 años?

- 0. No (*Pasar a pregunta 10*)
- 1. Sí
- 2. No lo recuerdo (*Pasar a pregunta 10*)

9. ¿Fueron estas conferencias, talleres, etc., útiles para mejorar sus competencias sobre las enfermedades raras?

- 0. No
- 1. Sí
- 2. No lo recuerdo

10. ¿Alguna vez ha atendido a un paciente con un diagnóstico de enfermedad rara?

- 0. No

- 1. Sí
- 2. No estoy seguro

11. Durante el curso de su práctica clínica calcule aproximadamente cuántos de sus pacientes han tenido una enfermedad rara

- 0. Ninguno
- 1. De 1 a 4 pacientes
- 2. De 5 a 10 pacientes
- 3. De 11 a 15 pacientes
- 4. De 15 a 20 pacientes
- 5. Más de 20 pacientes
- 6. Más de 100 pacientes

12. ¿Alguna vez ha atendido a un paciente con un grupo inusual de signos y síntomas para los cuales fue difícil establecer un diagnóstico definitivo?

- 0. No
- 1. Sí
- 2. No estoy seguro

13. ¿Cuándo fue la última vez que atendió a un paciente nuevo con cualquier enfermedad rara diagnosticada o con un grupo de signos o síntomas no diagnosticados?

- 0. Menos de 6 meses
- 1. De 6 a 12 meses
- 2. De 1 a 3 años
- 3. Más de 3 años
- 4. No he atendido a ninguno (Saltar a pregunta 24)

Si alguna vez ha diagnosticado o tratado a pacientes con enfermedades raras, ¿en cuál de las siguientes áreas encontró dificultades? **(Marque con una X. Puede seleccionar más de una)**

|                                                                                                                                             |  |
|---------------------------------------------------------------------------------------------------------------------------------------------|--|
| 14 Falta de guías clínicas de diagnóstico                                                                                                   |  |
| 15. Falta de acceso a pruebas diagnósticas                                                                                                  |  |
| 16. Retraso o incapacidad para hacer un diagnóstico definitivo                                                                              |  |
| 17. Falta de guías clínicas de tratamiento o de pautas de manejo                                                                            |  |
| 18. Falta de tratamientos disponibles                                                                                                       |  |
| 19. Dificultad para acceder a nuevos medicamentos o terapias que se usan actualmente en el extranjero, que aún no tienen licencia en España |  |
| 20. Incertidumbre sobre a qué personas o centros de referencia consultar                                                                    |  |
| 21. Dificultad para acceder a servicios de salud complementarios (por ejemplo fisioterapia, logopedia, psicología, etc.)                    |  |
| 22. Dificultad para acceder a pruebas genéticas                                                                                             |  |
| 23. Incertidumbre sobre los grupos de apoyo y asociaciones de enfermos disponibles para el paciente y su familia                            |  |

Anote el grado de acuerdo con estas afirmaciones, teniendo en cuenta que 1 es completamente en desacuerdo y 5 completamente de acuerdo (**ponga en otro color o rodee con un círculo la puntuación elegida**)

|                                                                                                                                      |   |   |   |   |   |
|--------------------------------------------------------------------------------------------------------------------------------------|---|---|---|---|---|
| 24. Considero que la formación médica (aspectos clínicos) que he recibido sobre las enfermedades raras es adecuada                   | 1 | 2 | 3 | 4 | 5 |
| 25. Considero que la formación que he recibido sobre la repercusión psicosocial de las enfermedades raras es adecuada                | 1 | 2 | 3 | 4 | 5 |
| 26. Me considero capacitado para coordinar la atención sanitaria de un paciente con una enfermedad rara                              | 1 | 2 | 3 | 4 | 5 |
| 27. Conozco el protocolo de actuación que debo seguir ante un paciente con una enfermedad rara                                       | 1 | 2 | 3 | 4 | 5 |
| 28. Me siento capacitado para dar asesoramiento genético a mis pacientes con enfermedades raras                                      | 1 | 2 | 3 | 4 | 5 |
| 29. Conozco la existencia de alguno de los registros de enfermedades raras existentes en nuestro país                                | 1 | 2 | 3 | 4 | 5 |
| 30. Tengo información suficiente sobre el funcionamiento de los registros de enfermedades raras                                      | 1 | 2 | 3 | 4 | 5 |
| 31. Sé lo que son las Unidades de Referencia para las enfermedades raras                                                             | 1 | 2 | 3 | 4 | 5 |
| 32. Conozco el papel que desempeñan estas Unidades de Referencia en el seguimiento de estas enfermedades                             | 1 | 2 | 3 | 4 | 5 |
| 33. Conozco la existencia del Centro de Referencia Estatal de Atención a Personas con enfermedades raras y sus familias              | 1 | 2 | 3 | 4 | 5 |
| 34. Conozco la forma de derivar a los pacientes a las Unidades de Referencia                                                         | 1 | 2 | 3 | 4 | 5 |
| 35. Conozco las funciones que desempeña el Centro de Referencia Estatal de Atención a Personas con enfermedades raras y sus Familias | 1 | 2 | 3 | 4 | 5 |
| 36. Conozco las organizaciones/asociaciones mundiales/nacionales que trabajan en el ámbito de las enfermedades raras                 | 1 | 2 | 3 | 4 | 5 |
| 37. ¿Le gustaría recibir formación sobre herencia o asesoramiento genético en relación a las enfermedades raras?                     | 1 | 2 | 3 | 4 | 5 |
| 38. ¿Le gustaría recibir formación sobre diagnóstico y tratamiento de las enfermedades raras?                                        | 1 | 2 | 3 | 4 | 5 |
| 39. ¿Le gustaría recibir información sobre páginas webs o fuentes de información sobre enfermedades raras?                           | 1 | 2 | 3 | 4 | 5 |
